# Supplementary material for: A journey through the Corynebacterium pseudotuberculosis proteome promotes insights into its functional genome
Source: PeerJ journal article supplement (doi:10.7717/peerj.12456), 2021-12-23
Supplement: Table_S.1.pdf [file Table_S.1.pdf]

**Table S.1: List of host proteins detected exclusively in diseased lymph nodes from the study conducted by Rees et al. (2015a)**

| <b>Protein</b>                                                                  | <b>Biological process and/or Molecular function</b>                           |
|---------------------------------------------------------------------------------|-------------------------------------------------------------------------------|
| Cathelicidin-2                                                                  | Defense response to bacterium                                                 |
| Complement component C3 (Fragment)                                              | Complement activation                                                         |
| Regakine 1-like protein                                                         | Immune response                                                               |
| CD11b                                                                           | Integrin-mediated signaling pathway                                           |
| MHC class I antigen                                                             | Antigen processing and presentation/immune response                           |
| MHC class I antigen                                                             | Antigen processing and presentation/immune response                           |
| Fc gamma 2 receptor                                                             | Immune response                                                               |
| Osteopontin                                                                     | Biomineral tissue development                                                 |
| Lactoferrin                                                                     | Immune response/antimicrobial activity                                        |
| Alpha-2-HS-glycoprotein                                                         | Regulation of inflammatory response                                           |
| Serum amyloid A protein (fragment)                                              | Inflammatory response                                                         |
| SERPINF1                                                                        | Regulation of neurogenesis and angiogenesis                                   |
| Serpin peptidase inhibitor clade B ovalbumin member 1<br>175 antigen (Fragment) | Negative regulation of interleukin-1 beta production<br>Inflammatory response |
| Heat shock protein 70                                                           | Stress response                                                               |
| Alpha-1-antitrypsin transcript variant 1                                        | Serine-type endopeptidase inhibitor activity                                  |
| Chitinase-3-like protein 1                                                      | Inflammatory response                                                         |
| Cytochrome b-245 alpha polypeptide (fragment)                                   | Heme binding                                                                  |
| Cytochrome b-245 beta polypeptide (fragment)                                    | Oxidoreductase activity                                                       |
| Fructose-1,6-bisphosphatase 1                                                   | Carbohydrate metabolism                                                       |
| Putative H-ATPase subunit B (Fragment)                                          | Ion transport                                                                 |
| Pyridoxal kinase                                                                | Pyridoxal 5'-phosphate salvage                                                |
| Coagulation factor II                                                           | Blood coagulation/acute-phase response                                        |
| Protein-arginine deiminase type-3                                               | Protein citrullination                                                        |
| SRI                                                                             | Transcriptional regulation                                                    |
| LDHA protein (fragment)                                                         | Carbohydrate metabolism                                                       |
| Ceruloplasmin                                                                   | Copper ion transport                                                          |
| Lactate dehydrogenase A (fragment)                                              | Carboxylic acid metabolic process                                             |
| Histone H2A.Z                                                                   | Cellular response to estradiol stimulus                                       |
| Insulin-like growth factor-binding protein-6                                    | Insulin-like growth factor binding                                            |
| Solute carrier family 2, facilitated glucose transporter member 3               | Glucose transmembrane transport                                               |
| Enolase (Fragment)                                                              | Glycolytic process                                                            |
| RAB10                                                                           | GTP binding                                                                   |

|                                                          |                                                                            |
|----------------------------------------------------------|----------------------------------------------------------------------------|
| 14-3-3 protein zeta/delta                                | Signal transduction                                                        |
| NADPH oxidase heavy chain subunit (fragment)             | Oxidoreductase activity                                                    |
| Serum albumin                                            | Metal ion binding                                                          |
| Carbonic anhydrase 2                                     | Angiotensin-activated signaling pathway/ dipeptide Transmembrane transport |
| Angiotensinogen                                          | Vasoconstriction                                                           |
| Ubiquitin-60S ribosomal protein L40                      | Translation                                                                |
| Asparaginase-like 1 protein (fragment)                   | Hydrolase activity                                                         |
| Beta-1,4-galactosyltransferase I                         | Protein glycosylation                                                      |
| Carnitine                                                | Carnitine O-palmitoyltransferase activity                                  |
| Copine I                                                 | Copine-domain                                                              |
| Enolase 1 (fragment)                                     | Glycolytic process                                                         |
| Eukaryotic translation initiation factor 5A              | Translation                                                                |
| Protein kinase C inhibitor KCIP-1 isoform eta (fragment) | Unknown function                                                           |
| RHOA                                                     | Signal transduction                                                        |
| Seryl-tRNA synthetase (fragment)                         | Selenocysteinyl-tRNA(Sec) biosynthetic process                             |
| Vimentin (fragment)                                      | Stabilization of type I collagen mRNA                                      |

---
